# Supplementary material
Source: publisher site journal article supplement (https://www.spandidos-publications.com/6675/downloadSupplementary)
Supplement: Supplementary file 1 [file downloadSupplementary]

Table SI. Characteristics of patients with sporadic cerebellar hemangioblastomas.

| Patient no. | Gender/age, years | Size of whole tumor, mm | Size of solid tumor, mm | Preoperative |           | Postoperative |            |              | Follow-up, months |
|-------------|-------------------|-------------------------|-------------------------|--------------|-----------|---------------|------------|--------------|-------------------|
|             |                   |                         |                         | TAE          | Operation | RT            | Recurrence | mRS $\geq 2$ |                   |
| 1           | M/53              | 26.8                    | 20.1                    | -            | GTR       | -             | +          | -            | 2                 |
| 2           | M/46              | 58.9                    | 6.7                     | -            | GTR       | -             | -          | -            | 2                 |
| 3           | F/38              | 26.1                    | 26.1                    | +            | GTR       | -             | -          | -            | 6                 |
| 4           | F/56              | 44.2                    | 44.2                    | +            | GTR       | -             | -          | -            | 8                 |
| 5           | F/65              | 33.0                    | 13                      | -            | GTR       | -             | -          | -            | 8                 |
| 6           | F/39              | 36.8                    | 8.1                     | -            | GTR       | -             | -          | -            | 9                 |
| 7           | M/57              | 52.2                    | 46.3                    | -            | GTR       | -             | -          | -            | 9                 |
| 8           | F/64              | 28.5                    | 20.7                    | -            | GTR       | -             | -          | -            | 14                |
| 9           | F/57              | 44.8                    | 10.6                    | -            | GTR       | -             | -          | -            | 14                |
| 10          | M/69              | 48.4                    | 8.6                     | -            | GTR       | -             | -          | -            | 14                |
| 11          | F/47              | 55.5                    | 7.8                     | -            | GTR       | -             | -          | -            | 15                |
| 12          | M/54              | 32.1                    | 3.2                     | -            | GTR       | -             | -          | -            | 15                |
| 13          | F/62              | 50.0                    | 50.0                    | +            | GTR       | -             | -          | -            | 16                |
| 14          | F/50              | 48.8                    | 8.8                     | -            | GTR       | -             | -          | -            | 18                |
| 15          | F/45              | 30.6                    | 30.6                    | +            | GTR       | -             | -          | -            | 18                |
| 16          | F/45              | 19.2                    | 3.6                     | -            | GTR       | -             | -          | -            | 18                |
| 17          | F/28              | 22.6                    | 10.5                    | -            | GTR       | -             | -          | -            | 18                |
| 18          | F/67              | 58.4                    | 6.5                     | -            | GTR       | -             | -          | -            | 19                |
| 19          | M/27              | 25.4                    | 10                      | -            | GTR       | -             | -          | -            | 20                |
| 20          | F/32              | 54.3                    | 7.8                     | -            | GTR       | -             | -          | -            | 20                |
| 21          | M/64              | 18.9                    | 6.5                     | -            | GTR       | -             | -          | -            | 24                |
| 22          | M/47              | 62.7                    | 34.6                    | -            | GTR       | -             | -          | -            | 26                |
| 23          | M/31              | 45.4                    | 5.6                     | -            | GTR       | -             | -          | -            | 30                |
| 24          | F/54              | 45.8                    | 10.5                    | -            | GTR       | -             | -          | -            | 34                |
| 25          | M/36              | 34.8                    | 8.9                     | -            | PR        | +             | +          | -            | 34                |
| 26          | M/66              | 45.6                    | 29.8                    | -            | GTR       | -             | -          | +            | 33                |
| 27          | M/72              | 55.1                    | 23.4                    | -            | PR        | +             | +          | -            | 35                |
| 28          | M/53              | 28.3                    | 5.6                     | -            | GTR       | -             | -          | -            | 37                |
| 29          | M/41              | 43.1                    | 6.5                     | -            | GTR       | -             | -          | -            | 39                |
| 30          | M/41              | 53.9                    | 6.8                     | -            | GTR       | -             | -          | -            | 43                |
| 31          | M/53              | 40.2                    | 5.6                     | -            | GTR       | -             | -          | -            | 44                |
| 32          | M/38              | 50.3                    | 50.3                    | +            | GTR       | -             | -          | -            | 44                |
| 33          | F/53              | 38.6                    | 5.6                     | -            | GTR       | -             | -          | -            | 45                |
| 34          | M/44              | 40.4                    | 5.6                     | -            | GTR       | -             | -          | -            | 48                |
| 35          | M/72              | 53.9                    | 6.5                     | -            | GTR       | -             | -          | -            | 51                |
| 36          | M/49              | 43.7                    | 3.2                     | -            | GTR       | -             | -          | -            | 52                |
| 37          | F/23              | 39.1                    | 4.5                     | -            | GTR       | -             | -          | -            | 51                |
| 38          | F/47              | 27.1                    | 27.1                    | -            | GTR       | -             | -          | +            | 52                |

|    |      |      |      |   |     |   |   |   |     |
|----|------|------|------|---|-----|---|---|---|-----|
| 39 | F/30 | 50.0 | 50.0 | + | GTR | - | - | - | 53  |
| 40 | M/65 | 32.7 | 3.5  | - | GTR | - | - | - | 54  |
| 41 | M/36 | 45.7 | 6.5  | - | GTR | - | - | - | 55  |
| 42 | M/31 | 25.0 | 4.5  | - | GTR | - | - | - | 56  |
| 43 | M/47 | 25.2 | 3.6  | - | GTR | - | - | - | 57  |
| 44 | F/50 | 15.8 | 3.5  | - | GTR | - | - | - | 57  |
| 45 | M/69 | 48.6 | 3.4  | - | GTR | - | - | - | 60  |
| 46 | M/32 | 40.3 | 3.9  | - | GTR | - | - | - | 61  |
| 47 | M/31 | 32.1 | 3.8  | - | GTR | - | - | - | 61  |
| 48 | M/67 | 25.5 | 25.5 | - | GTR | - | - | + | 64  |
| 49 | F/36 | 20.0 | 10   | - | GTR | - | - | - | 66  |
| 50 | F/31 | 20.8 | 20.8 | + | GTR | - | - | - | 66  |
| 51 | M/62 | 42.4 | 6.5  | - | GTR | - | - | - | 65  |
| 52 | F/38 | 30.1 | 3.2  | - | GTR | - | - | - | 67  |
| 53 | F/28 | 46.9 | 6.8  | - | GTR | - | - | - | 68  |
| 54 | F/29 | 40.7 | 6.5  | - | PR  | + | + | - | 70  |
| 55 | F/27 | 30.3 | 30.3 | + | GTR | - | - | - | 71  |
| 56 | F/52 | 25.4 | 4.5  | - | GTR | - | - | - | 73  |
| 57 | M/49 | 30.4 | 5.5  | - | GTR | - | - | - | 73  |
| 58 | M/62 | 36.5 | 10.6 | - | GTR | - | - | - | 75  |
| 59 | F/28 | 39.6 | 6.5  | - | GTR | - | - | - | 75  |
| 60 | F/42 | 47.0 | 6.8  | - | GTR | - | - | - | 76  |
| 61 | F/52 | 19.0 | 10.5 | - | GTR | - | - | - | 76  |
| 62 | M/43 | 40.1 | 6.5  | - | GTR | - | - | - | 78  |
| 63 | F/70 | 30.7 | 10.5 | - | GTR | - | - | - | 80  |
| 64 | F/32 | 40.6 | 6.8  | - | GTR | - | - | - | 83  |
| 65 | F/69 | 30.5 | 10.6 | - | GTR | - | - | - | 85  |
| 66 | M/29 | 55.1 | 6.9  | - | GTR | - | - | - | 86  |
| 67 | M/36 | 35.4 | 10.4 | - | GTR | - | - | - | 94  |
| 68 | M/56 | 40.0 | 40.0 | - | GTR | - | - | + | 96  |
| 69 | M/35 | 39.9 | 10.8 | - | GTR | - | - | - | 96  |
| 70 | M/35 | 36.0 | 15.0 | - | GTR | - | - | - | 98  |
| 71 | M/52 | 35.5 | 10.6 | - | GTR | - | - | - | 99  |
| 72 | M/38 | 30.6 | 10.9 | - | GTR | - | - | - | 101 |
| 73 | M/30 | 42.7 | 30.5 | - | GTR | - | - | + | 101 |
| 74 | F/39 | 45.6 | 6.9  | - | GTR | - | - | - | 102 |
| 75 | F/23 | 30.1 | 25.0 | - | GTR | - | - | - | 106 |
| 76 | M/44 | 37.1 | 8.9  | - | GTR | - | - | - | 111 |

TAE, transarterial embolization; RT, radiotherapy; GTR, gross total resection; PR, partial resection.
